# Supplementary material for: Selective CO2 methanation on Ru/TiO2 catalysts: unravelling the decisive role of the TiO2 support crystal structure
Source: Royal Society of Chemistry journal article supplement (doi:10.1039/c6cy01677d), 2016-01-01
Supplement: c6cy01677d2.pdf [file c6cy01677d2.pdf]

# Selective CO<sub>2</sub> methanation on Ru/TiO<sub>2</sub> catalysts: unravelling the decisive role of the TiO<sub>2</sub> support crystal structure

A. Kim,<sup>a,b</sup> C. Sanchez,<sup>b</sup> G. Patriarche,<sup>c</sup> O. Ersen,<sup>d</sup> S. Moldovan,<sup>d</sup> A. Wisnet,<sup>e</sup> C. Sassoie,<sup>\*b</sup> D. P. Debecker<sup>\*a</sup>

---

<sup>a</sup> Institute of Condensed Matter and Nanoscience - MOlecules, Solids and reactiviTy (IMCN / MOST), Université catholique de Louvain. Croix du Sud 2 box L7.05.17, 1348 Louvain-La-Neuve, Belgium

<sup>b</sup> Sorbonne Universités, UPMC Univ Paris 06, CNRS, Collège de France, Laboratoire de Chimie de la Matière Condensée de Paris, 11 place Marcelin Berthelot, 75005 Paris, France

<sup>c</sup> Laboratoire de Photonique et de Nanostructures (LPN), CNRS, Université Paris-Saclay, route de Nozay, F-91460 Marcoussis, France

<sup>d</sup> Institut de Physique et Chimie des Matériaux de Strasbourg, UMR7504 CNRS-UNISTRA and NIE, 23 rue du Loess, B.P. 43, 67034 Strasbourg cedex 2, France

<sup>e</sup> Department of Chemistry and CeNS, Ludwig-Maximilians-University, Butenandtstrasse 11, 81377 Munich, Germany

† Footnotes relating to the title and/or authors should appear here.

## Supporting Information

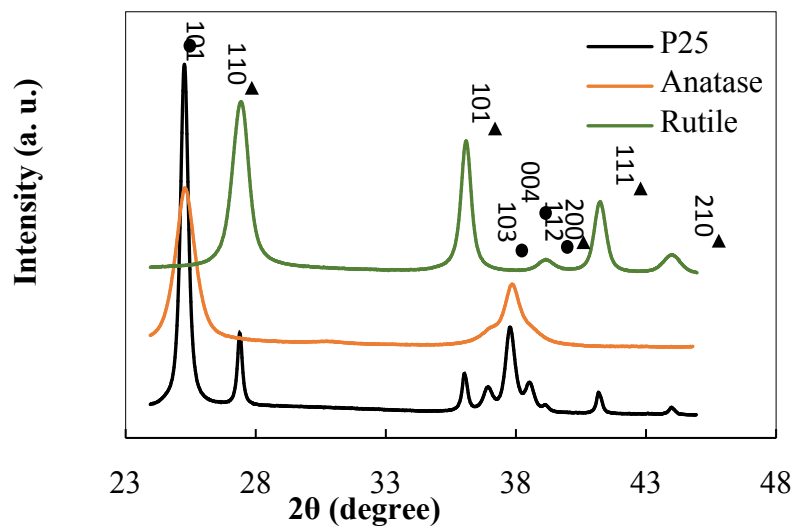

**SI-1.** XRD patterns of the support prior  $\text{RuO}_2$  deposition. P25  $\text{TiO}_2$  (anatase (⊗) and rutile(⊙)) in black; anatase  $\text{TiO}_2$  in orange and rutile  $\text{TiO}_2$  in green.

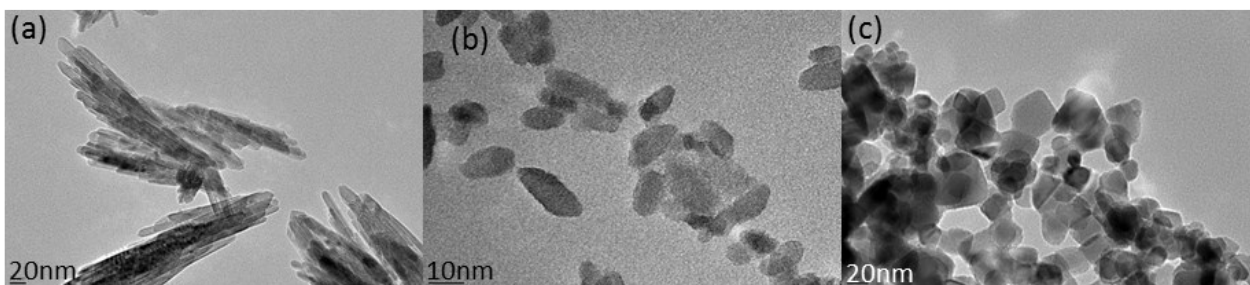

**SI-2:** TEM images showing the morphology of the TiO<sub>2</sub> support particle alone, prior RuO<sub>2</sub> deposition. (a) rutile, (b) anatase and (c) P25.

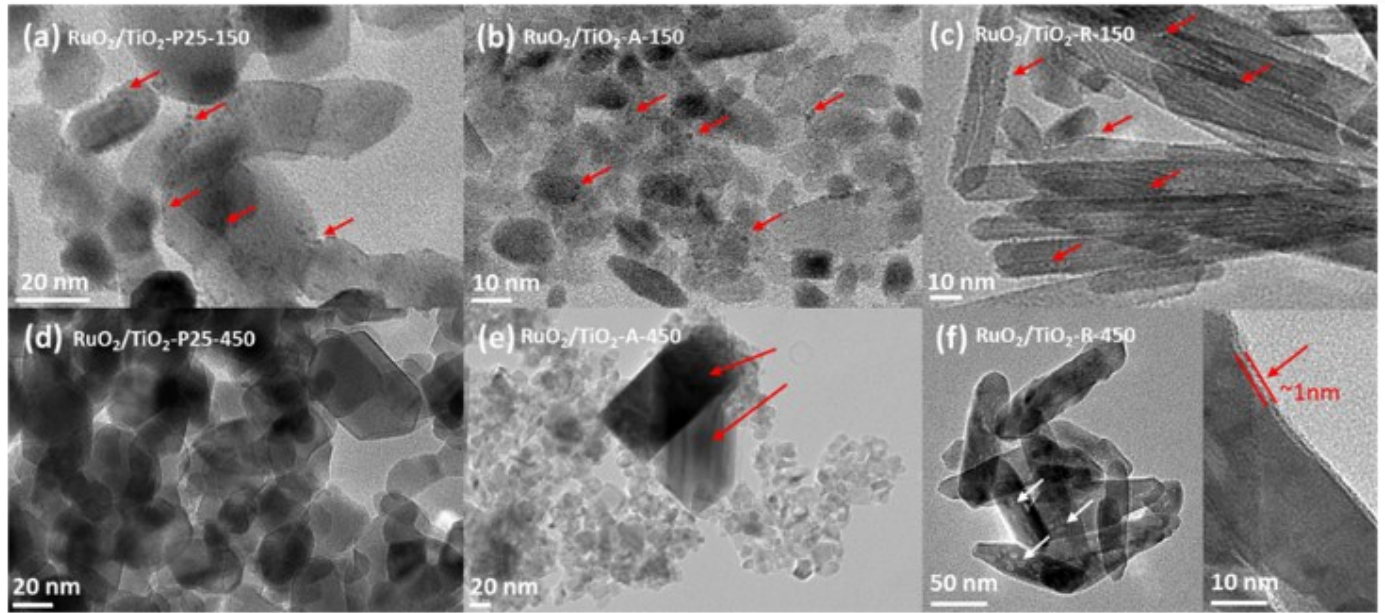

**SI-3.** TEM micrographs of RuO<sub>2</sub>/TiO<sub>2</sub> catalysts annealed at 150 °C; (a) on P25, (b) on anatase, and (c) on rutile, and TEM micrograph of the same catalysts after being annealed at 450 °C; (d) on P25, (e) on anatase, and (f) on rutile TiO<sub>2</sub>, respectively. Red arrows point RuO<sub>2</sub> and white arrows point RuO<sub>2</sub>-depleted areas.

**SI-4.** TEM tomography (3D analysis) that underlines the quite uniform distribution of RuO<sub>2</sub> NPs on P25 TiO<sub>2</sub> nanoparticles after annealing at 150 °C. Media file corresponding to the tomography analysis: **initial-mix.avi**

|                                             | Ru (w%) |
|---------------------------------------------|---------|
| RuO <sub>2</sub> /TiO <sub>2</sub> -P25-450 | 2,43    |
| RuO <sub>2</sub> /TiO <sub>2</sub> -A-450   | 2,35    |
| RuO <sub>2</sub> /TiO <sub>2</sub> -R-450   | 2,60    |

**SI-5:** ICP-AES elemental analysis of the 450°C annealed catalyst. Small variations in the Ru content come from water variation content in the RuCl<sub>3</sub>.xH<sub>2</sub>O (x= 3-5) precursor.

| Annealing Temperature (°C) | Reaction Temperature (°C) | CH <sub>4</sub> production rate ( $\mu\text{mol}_{\text{CH}_4} \text{g}_{\text{cat}}^{-1} \text{s}^{-1}$ ) |                                       |                                       |
|----------------------------|---------------------------|------------------------------------------------------------------------------------------------------------|---------------------------------------|---------------------------------------|
|                            |                           | RuO <sub>2</sub> /TiO <sub>2</sub> -P25                                                                    | RuO <sub>2</sub> /TiO <sub>2</sub> -A | RuO <sub>2</sub> /TiO <sub>2</sub> -R |
| 150                        | 50                        | 0.000                                                                                                      | 0.000                                 | 0.000                                 |
|                            | 85                        | 0.000                                                                                                      | 0.000                                 | 0.000                                 |
|                            | 100                       | 0.000                                                                                                      | 0.000                                 | 0.000                                 |
|                            | 125                       | 0.000                                                                                                      | 0.005                                 | 0.000                                 |
|                            | 150                       | 0.016                                                                                                      | 0.023                                 | 0.013                                 |
|                            | 165                       | 0.035                                                                                                      | 0.050                                 | 0.033                                 |
|                            | 185                       | 0.076                                                                                                      | 0.109                                 | 0.082                                 |
|                            | 200                       | 0.126                                                                                                      | 0.167                                 | 0.145                                 |
| 250                        | 50                        | 0.000                                                                                                      | 0.001                                 | 0.000                                 |
|                            | 85                        | 0.005                                                                                                      | 0.006                                 | 0.000                                 |
|                            | 100                       | 0.017                                                                                                      | 0.019                                 | 0.006                                 |
|                            | 125                       | 0.069                                                                                                      | 0.075                                 | 0.030                                 |
|                            | 150                       | 0.184                                                                                                      | 0.208                                 | 0.099                                 |
|                            | 165                       | 0.317                                                                                                      | 0.395                                 | 0.185                                 |
|                            | 185                       | 0.583                                                                                                      | 0.745                                 | 0.402                                 |
|                            | 200                       | 0.848                                                                                                      | 1.025                                 | 0.619                                 |
| 350                        | 50                        | 0.000                                                                                                      | 0.001                                 | 0.000                                 |
|                            | 85                        | 0.012                                                                                                      | 0.008                                 | 0.000                                 |
|                            | 100                       | 0.032                                                                                                      | 0.021                                 | 0.008                                 |
|                            | 125                       | 0.113                                                                                                      | 0.084                                 | 0.050                                 |
|                            | 150                       | 0.316                                                                                                      | 0.256                                 | 0.155                                 |
|                            | 165                       | 0.543                                                                                                      | 0.447                                 | 0.287                                 |
|                            | 185                       | 1.014                                                                                                      | 0.919                                 | 0.562                                 |
|                            | 200                       | 1.464                                                                                                      | 1.310                                 | 0.903                                 |
| 450                        | 50                        | 0.000                                                                                                      | 0.000                                 | 0.000                                 |
|                            | 85                        | 0.018                                                                                                      | 0.010                                 | 0.004                                 |
|                            | 100                       | 0.045                                                                                                      | 0.027                                 | 0.012                                 |
|                            | 125                       | 0.160                                                                                                      | 0.102                                 | 0.047                                 |
|                            | 150                       | 0.435                                                                                                      | 0.282                                 | 0.143                                 |
|                            | 165                       | 0.898                                                                                                      | 0.532                                 | 0.283                                 |
|                            | 185                       | 1.707                                                                                                      | 1.048                                 | 0.602                                 |
|                            | 200                       | 2.572                                                                                                      | 1.588                                 | 0.982                                 |
| 550                        | 50                        | 0.000                                                                                                      | 0.000                                 | 0.000                                 |
|                            | 85                        | 0.013                                                                                                      | 0.006                                 | 0.000                                 |
|                            | 100                       | 0.035                                                                                                      | 0.017                                 | 0.006                                 |
|                            | 125                       | 0.125                                                                                                      | 0.070                                 | 0.026                                 |
|                            | 150                       | 0.362                                                                                                      | 0.205                                 | 0.092                                 |
|                            | 165                       | 0.713                                                                                                      | 0.350                                 | 0.178                                 |
|                            | 185                       | 1.436                                                                                                      | 0.594                                 | 0.419                                 |
|                            | 200                       | 2.202                                                                                                      | 0.952                                 | 0.656                                 |

**SI-6.** Catalytic activities of different TiO<sub>2</sub> supported catalysts at various annealing temperatures and reaction temperatures

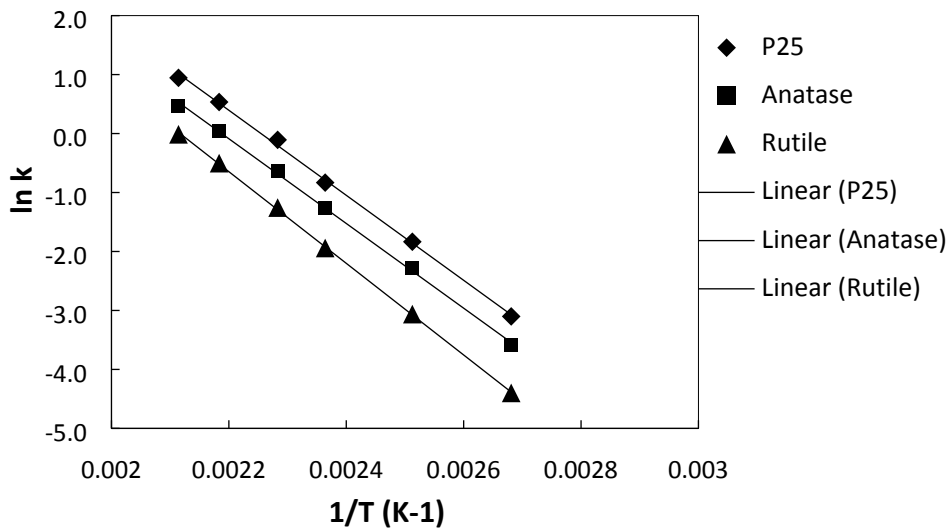

**SI-7.** Arrhenius plot for determination of activation energy obtained from 100 to 200 °C reaction temperatures.



| Annealing T (°C) | P25 | Anatase | Rutile |        |
|------------------|-----|---------|--------|--------|
|                  |     |         | width  | length |
| 150              | 28  | 6       | 11     | 100    |
| 250              | 22  | 8       | 11     | 105    |
| 350              | 25  | 10      | 17     | 95     |
| 450              | 25  | 11      | 24     | 97     |

**SI-8:** TiO<sub>2</sub> particle size (in nm) of RuO<sub>2</sub>/TiO<sub>2</sub> catalysts measured by TEM analysis

|                | (°C)       | rutile |     |     |     | anatase |     |     | mean size (Å) |
|----------------|------------|--------|-----|-----|-----|---------|-----|-----|---------------|
|                |            | 110    | 101 | 200 | 101 | 103     | 004 | 112 |               |
| <b>P25</b>     | <b>150</b> | 48     | 49  | 55  | 27  | 25      | 23  | 24  | 36            |
|                | <b>250</b> | 53     | 51  | 39  | 27  | 26      | 23  | 24  | 35            |
|                | <b>350</b> | 49     | 48  | 34  | 27  | 25      | 23  | 24  | 33            |
|                | <b>450</b> | 52     | 48  | 32  | 27  | 27      | 23  | 25  | 33            |
| <b>anatase</b> | <b>150</b> |        |     |     | 10  | 10      | 13  | 8   | 10            |
|                | <b>250</b> |        |     |     | 10  | 10      | 14  | 8   | 10            |
|                | <b>350</b> |        |     |     | 11  | 16      | 13  | 8   | 12            |
|                | <b>450</b> |        |     |     | 16  | 17      | 17  | 15  | 16,0          |
| <b>rutile</b>  | <b>150</b> | 12     |     | 13  |     |         |     |     | 13            |
|                | <b>250</b> | 13     |     | 14  |     |         |     |     | 14            |
|                | <b>350</b> | 16     |     | 17  |     |         |     |     | 17            |
|                | <b>450</b> | 21     |     | 20  |     |         |     |     | 21            |

**SI-9.** TiO<sub>2</sub> support particle sizes calculated from the Scherrer equation. In case of pure rutile TiO<sub>2</sub> support, only the widths of the needle are calculated.

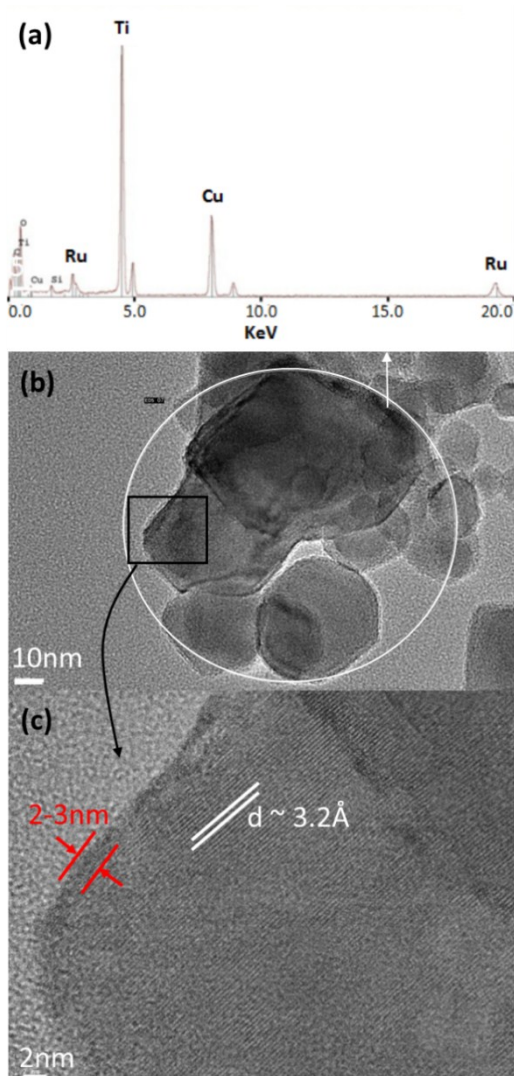

**SI-10.** RuO<sub>2</sub>/TiO<sub>2</sub>-P25-250. (a) EDX spectrum showing the presence of Ru; (b) TEM images showing the presence of Ru on rutile TiO<sub>2</sub> particles and the EDX analysis; (c) zoomed image of a catalyst particle corresponding to the d-spacing of rutile phase. Red arrows indicate the thickness of RuO<sub>2</sub> aggregates/layers.

|                         | hkl                     | P25 support    |          | anatase support |          | rutile support |                |
|-------------------------|-------------------------|----------------|----------|-----------------|----------|----------------|----------------|
|                         |                         | 2 $\theta$ (°) | FWHM (°) | 2 $\theta$ (°)  | FWHM (°) | 2 $\theta$ (°) | FWHM (°)       |
| 150°C                   | anatase                 | 101            | 25,2946  | 0,3419          | 25,2544  | 0,8953         |                |
|                         | TiO <sub>2</sub> rutile | 110            | 27,4262  | 0,2105          |          |                | 27,4015 0,7226 |
|                         | RuO <sub>2</sub>        | 110            |          |                 |          |                |                |
|                         | RuO <sub>2</sub>        | 101            |          |                 |          |                |                |
|                         | TiO <sub>2</sub> rutile | 101            | 36,0699  | 0,2082          |          |                | 36,0602 0,4556 |
|                         | anatase                 | 103            | 36,9544  | 0,3691          | 36,9435  | 0,9111         |                |
|                         | anatase                 | 004            | 37,8196  | 0,3959          | 37,8177  | 0,6631         |                |
|                         | anatase                 | 112            | 38,5640  | 0,3801          | 38,5289  | 1,0937         |                |
|                         | TiO <sub>2</sub> rutile | 200            | 39,1837  | 0,1927          |          |                | 39,2081 0,6722 |
|                         | 250°C                   | anatase        | 101      | 25,3095         | 0,3412   | 25,2761        | 0,8814         |
| TiO <sub>2</sub> rutile |                         | 110            | 27,4552  | 0,1924          |          |                | 27,4104 0,6663 |
| RuO <sub>2</sub>        |                         | 110            |          |                 |          |                |                |
| RuO <sub>2</sub>        |                         | 101            |          |                 |          |                |                |
| TiO <sub>2</sub> rutile |                         | 101            | 36,0550  | 0,2016          |          |                | 36,0518 0,4407 |
| anatase                 |                         | 103            | 36,9715  | 0,3597          | 37,0052  | 0,8381         |                |
| anatase                 |                         | 004            | 37,8274  | 0,4018          | 37,8564  | 0,6431         |                |
| anatase                 |                         | 112            | 38,5701  | 0,3869          | 38,5308  | 1,0354         |                |
| TiO <sub>2</sub> rutile |                         | 200            | 39,2214  | 0,2512          |          |                | 39,1536 0,6193 |
| 350°C                   |                         | anatase        | 101      | 25,3147         | 0,3424   | 25,2918        | 0,7784         |
|                         | TiO <sub>2</sub> rutile | 110            | 27,4642  | 0,2040          |          |                | 27,4084 0,5366 |
|                         | RuO <sub>2</sub>        | 110            | 27,7428  | 0,6486          | 27,9673  | 1,0202         |                |
|                         | RuO <sub>2</sub>        | 101            | 35,3337  | 1,2289          | 35,0446  | 0,5075         |                |
|                         | TiO <sub>2</sub> rutile | 101            | 36,0624  | 0,2109          |          |                | 36,0466 0,3822 |
|                         | anatase                 | 103            | 36,9731  | 0,3664          | 36,9923  | 0,5518         |                |
|                         | anatase                 | 004            | 37,8292  | 0,4031          | 37,8831  | 0,6769         |                |
|                         | anatase                 | 112            | 38,5728  | 0,3839          | 38,5370  | 1,1692         |                |
|                         | TiO <sub>2</sub> rutile | 200            | 39,2401  | 0,2883          |          |                | 39,1527 0,5385 |
|                         | 450°C                   | anatase        | 101      | 25,3259         | 0,3345   | 25,2678        | 0,5608         |
| TiO <sub>2</sub> rutile |                         | 110            | 27,4777  | 0,1970          | 27,5107  | 0,4342         | 27,4084 0,4332 |
| RuO <sub>2</sub>        |                         | 110            | 27,7222  | 0,5689          | 27,9774  | 0,4925         |                |
| RuO <sub>2</sub>        |                         | 101            | 35,4020  | 1,1626          | 35,0278  | 0,5013         |                |
| TiO <sub>2</sub> rutile |                         | 101            | 36,0676  | 0,2128          | 35,7809  | 0,7159         | 36,0495 0,3158 |
| anatase                 |                         | 103            | 36,9830  | 0,3520          | 36,9656  | 0,5313         |                |
| anatase                 |                         | 004            | 37,8387  | 0,3930          | 37,8282  | 0,5451         |                |
| anatase                 |                         | 112            | 38,5826  | 0,3726          | 38,5464  | 0,5902         |                |
| TiO <sub>2</sub> rutile |                         | 200            | 39,2594  | 0,2974          |          |                | 39,1617 0,4659 |

**SI-11.** Deconvolution of XRD peaks from 150 to 450 °C on the various support (P25, anatase and rutile). RuO<sub>2</sub> peaks can only be deconvoluted with reasonable width from high temperature on P25 and anatase. The proximity of the RuO<sub>2</sub> peaks to TiO<sub>2</sub> rutile prevents deconvolution of RuO<sub>2</sub> peak on the pure rutile TiO<sub>2</sub> support.

The difference in cell parameters cannot be linked only with  $\text{Ti}^{4+}$  and  $\text{Ru}^{4+}$  radii (0.605 Å and 0.620 Å respectively;  $a(\text{RuO}_2)$  is smaller than  $a(\text{TiO}_2)$  and  $c(\text{RuO}_2)$  is bigger than  $c(\text{TiO}_2)$ ).<sup>1</sup> Accordingly,  $d_{110}(\text{RuO}_2)$  (3.183 Å) is smaller than  $d_{110}(\text{TiO}_2)$  (3.247 Å), and  $d_{101}(\text{RuO}_2)$  (2.558 Å) is bigger than  $d_{101}(\text{TiO}_2)$  (2.487 Å).

The rutile structure can be briefly described as distorted  $\text{MO}_6$  octahedra connected by their edges to form chains along the [001] direction. These chains are linked together by the octahedra vertices in the directions [110] and [1-1 0].

The consequence of differences in cell parameters is that the slightly distorted  $\text{MO}_6$  octahedra are not oriented in the same way for  $\text{RuO}_2$  and  $\text{TiO}_2$  rutile structures: Two short Ru-O bonds (1.942 Å) propagate along the [110] direction for  $\text{RuO}_2$  whereas this direction concerns the two long Ti-O bonds (1.978 Å) for  $\text{TiO}_2$ . For  $\text{RuO}_2$ , the four remaining long Ru-O bonds (1.984 Å) are strongly governed by the c axis, whereas in case of  $\text{TiO}_2$ , the four short Ti-O bonds (1.945 Å) are restricted by the c axis. Accordingly, the significant increase of  $d_{110}(\text{RuO}_2)$  upon  $\text{RuO}_2$  crystallization in proximity to rutile  $\text{TiO}_2$  means an increase in length of the two short Ru-O bonds. Similarly, the decrease of  $d_{101}(\text{RuO}_2)$  contributes mostly to the decrease in the length of the long Ru-O bonds. Thus, in  $\text{RuO}_2/\text{TiO}_2$ -P25 catalyst, the shifts in the (110) and (101)  $\text{RuO}_2$  peak positions respectively towards the (110) and (101) rutile  $\text{TiO}_2$  peaks indicate that  $\text{RuO}_2$  nanoparticles are apt to crystallize adopting the rutile  $\text{TiO}_2$  structure, which is referred to as epitaxial growth. This means that  $\text{RuO}_6$  octahedra are globally less distorted in presence of rutile phase of P25 support than being crystallized into  $\text{RuO}_2$  structure alone.

**SI-12.** Explanation on the shift in  $\text{RuO}_2$  peak positions towards rutile  $\text{TiO}_2$  peak positions and its consequences on the  $\text{RuO}_2$  structure.

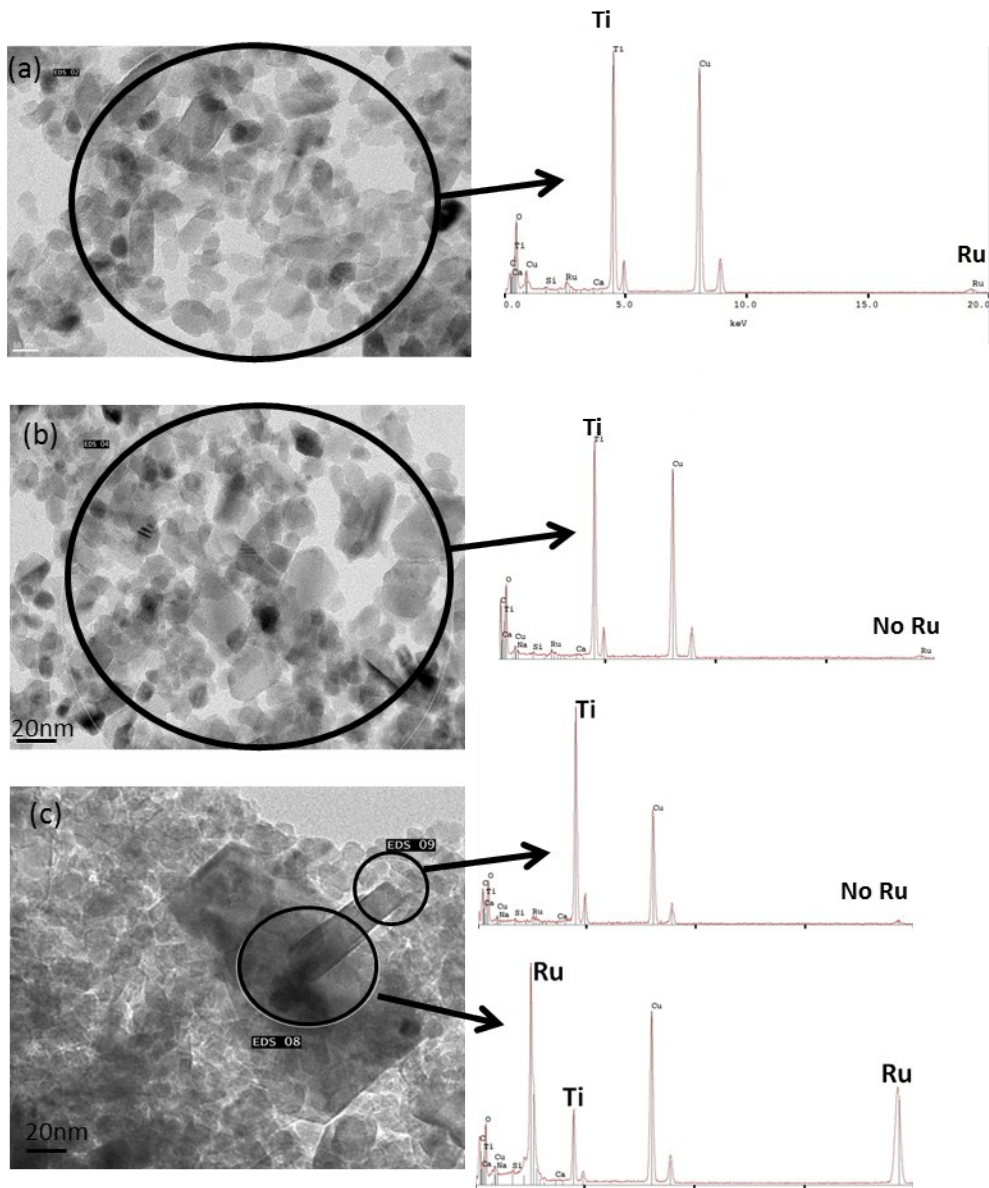

**SI-13:** TEM images of RuO<sub>2</sub>/TiO<sub>2</sub>-A catalyst annealed at 250°C (a) and 350°C (b-c) with the corresponding EDX analysis showing a good dispersion of RuO<sub>2</sub> at 250°C, and RuO<sub>2</sub> big crystals (c) separated from TiO<sub>2</sub> naked anatase (b) on which rutile TiO<sub>2</sub> has grown (c) at 350°C.

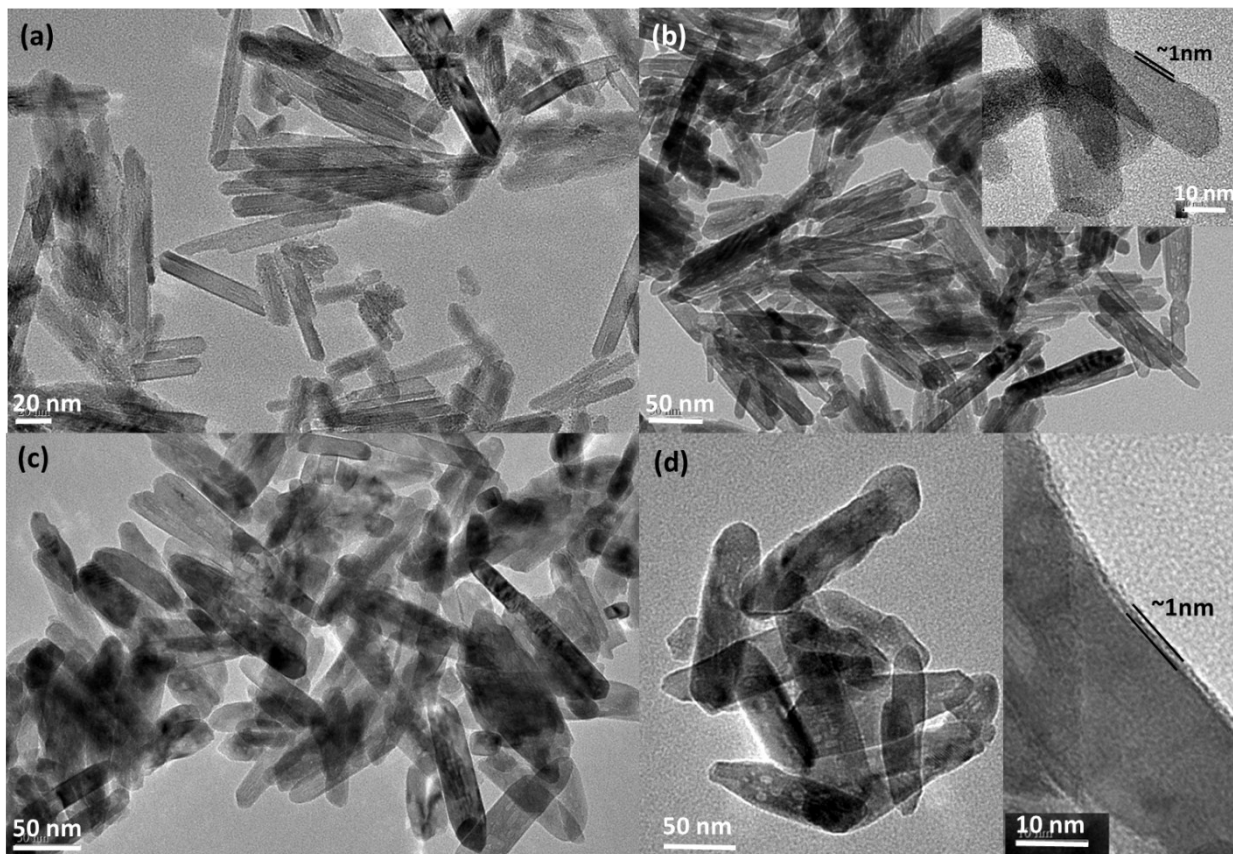

**S-14.** TEM images of  $\text{RuO}_2/\text{TiO}_2\text{-R}$  after annealing at (a)  $150^\circ\text{C}$ , (b)  $250^\circ\text{C}$ , (c)  $350^\circ\text{C}$ , and (d)  $450^\circ\text{C}$ .

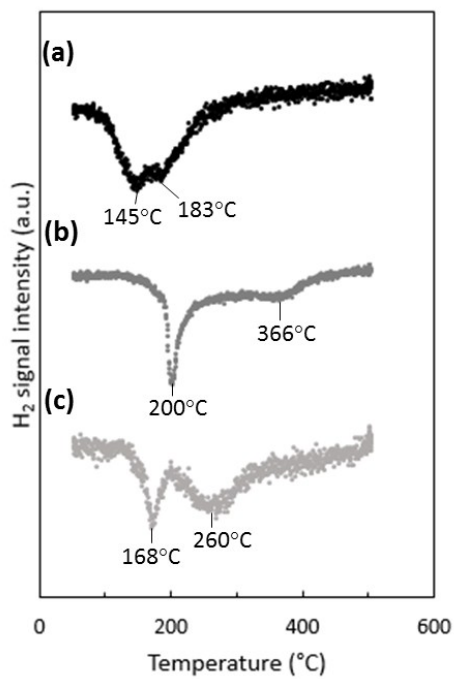

**SI-15:** TPR results for (a) RuO<sub>2</sub>/TiO<sub>2</sub>-P25-450, (b) RuO<sub>2</sub>/TiO<sub>2</sub>-A-450, and (c) RuO<sub>2</sub>/TiO<sub>2</sub>-R-450.



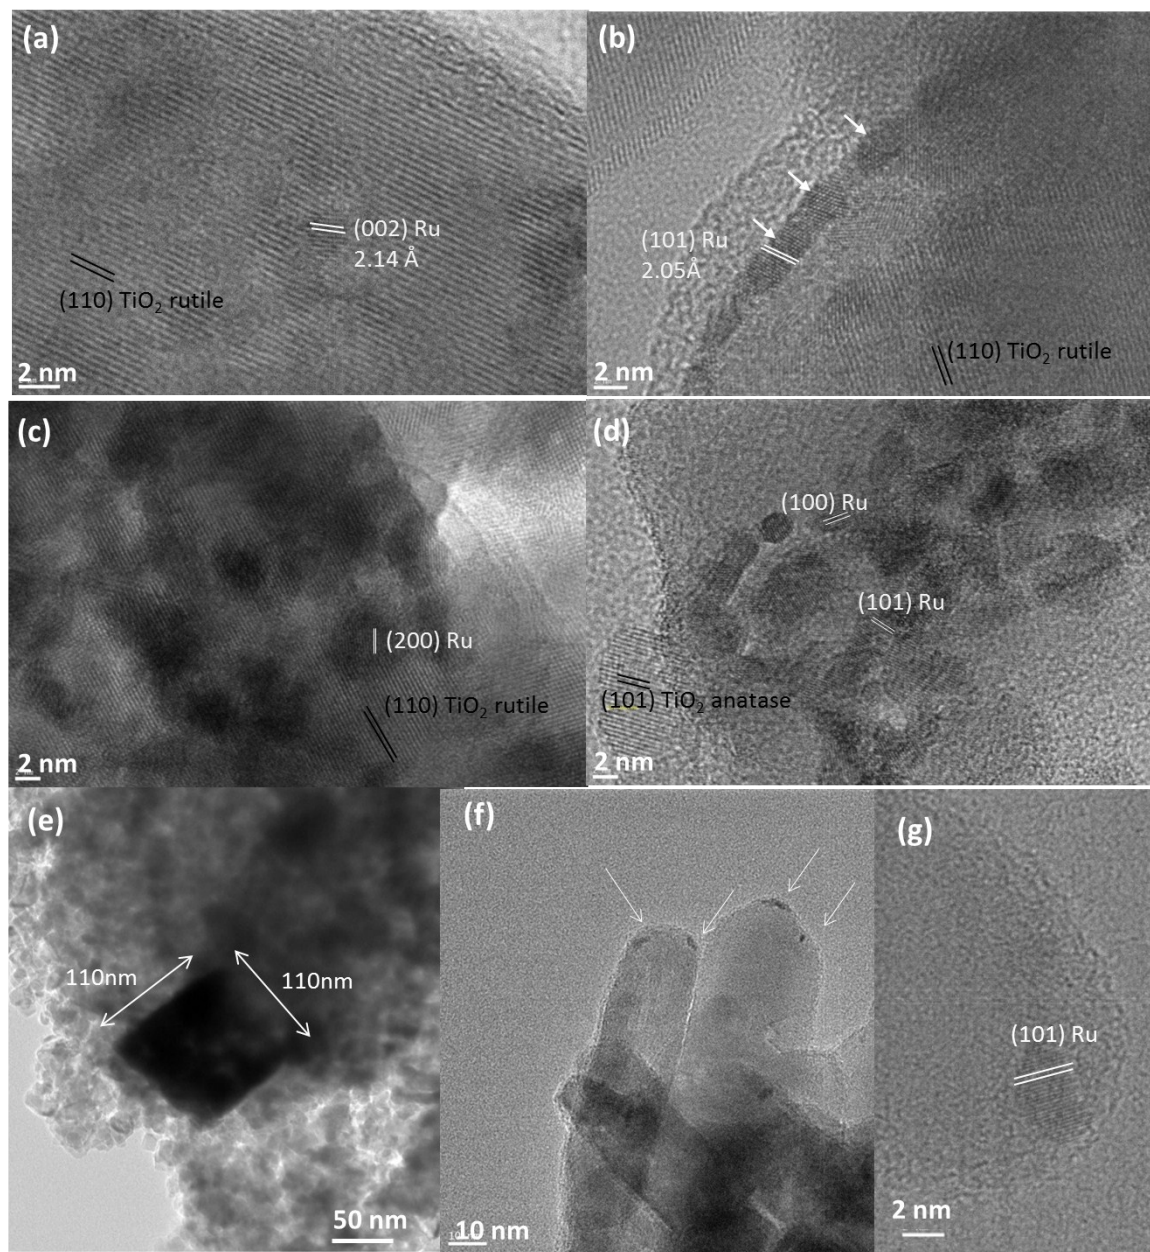

**SI-16:** HR-TEM pictures of the 450°C-catalysts post methanation clearly showing the Ru crystallographic planes on all support: Rutile TiO<sub>2</sub> from P25 support (a-b), anatase TiO<sub>2</sub> support (c-e) and rutile TiO<sub>2</sub> support (f-g). On anatase support, few TiO<sub>2</sub> rutile planes are distinguished, coming from RuO<sub>2</sub> -promoted crystallization (c); few compact Ru aggregate, too thick to allow the electron beam to fully distinguish the Ru particles present the global shapes and sizes of RuO<sub>2</sub> crystals prior reduction (e).

**SI-17.** TEM tomography (3D analysis) of the P<sup>25</sup>-450 tested catalyst that underlines the presence of Ru patches only on specific TiO<sub>2</sub> P25 particles. Media file corresponding to the tomography analysis :**test-mix.avi**

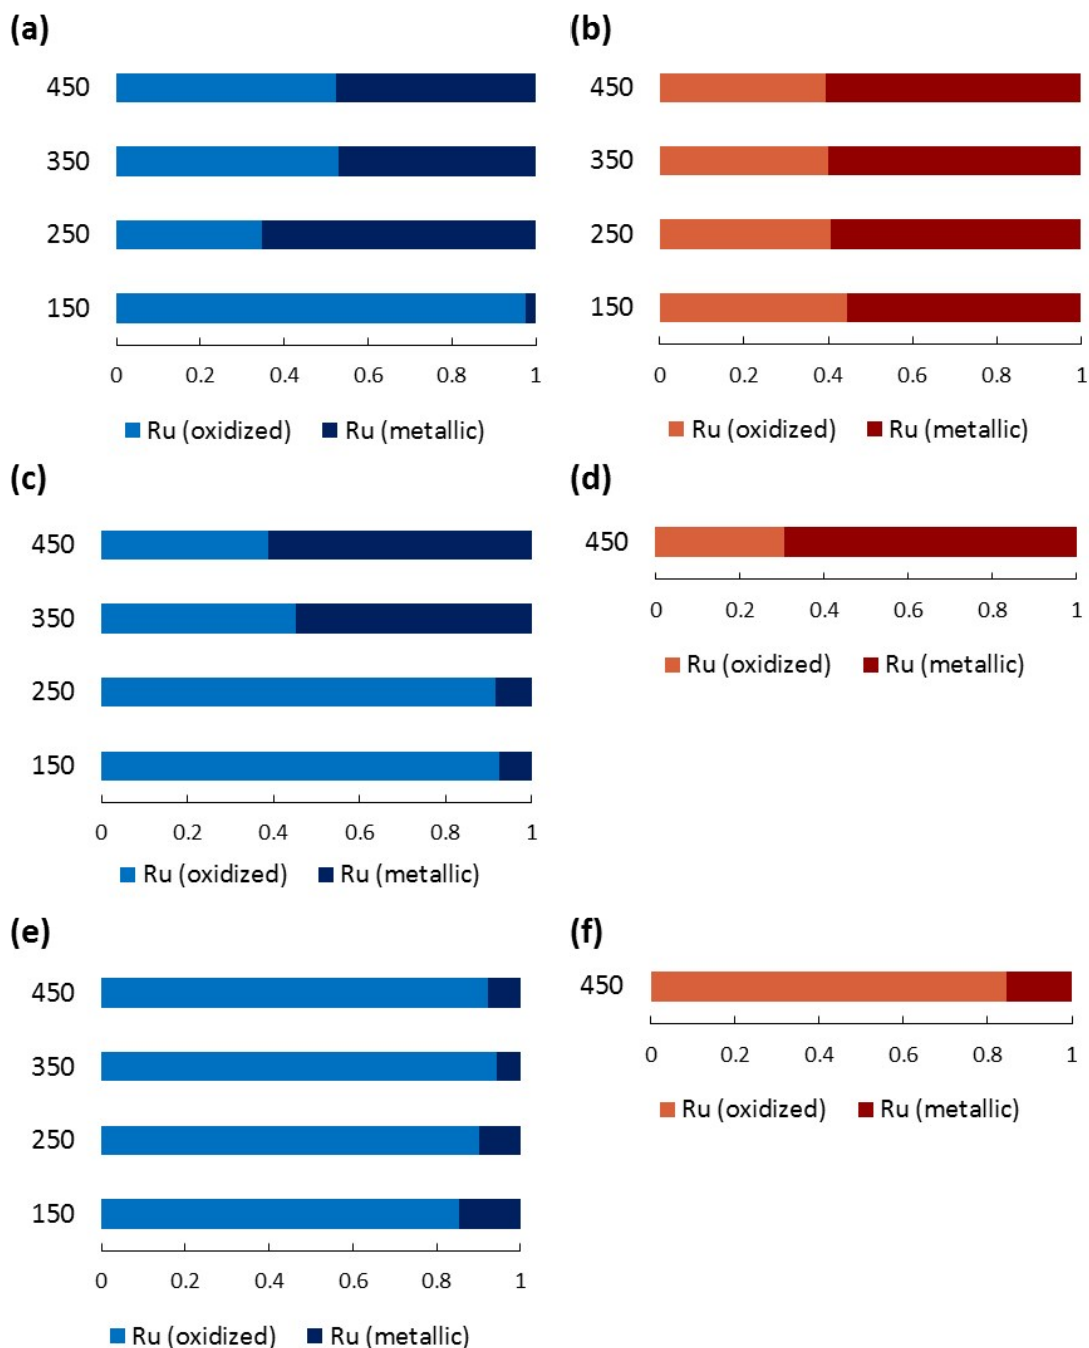

**SI-18.** Proportions of oxidized and metallic Ru species by XPS; (a) RuO<sub>2</sub>/TiO<sub>2</sub>-P25 (before reduction), (b) Ru/TiO<sub>2</sub>-P25 (after methanation), (c) RuO<sub>2</sub>/TiO<sub>2</sub>-A (before reduction), (d) Ru/TiO<sub>2</sub>-A (after methanation), (e) RuO<sub>2</sub>/TiO<sub>2</sub>-R (before reduction), and (f) Ru/TiO<sub>2</sub>-R (after methanation)

The Scherrer equation was used to calculate the crystallite size of particles:

$$s = \frac{K \cdot \lambda}{\beta \cos \theta}$$

s = mean size perpendicular to hkl plane (Å)

K the shape factor, 0.9 for this study

$\lambda$  = the XRay wavelength (1.5419Å, the mean wavelength for K $\alpha$ 1 K $\alpha$ 2 ray)

$\beta$  = the peak broadening at half maximum intensity in radian, taking into account 0.04° broadening in the used 2 $\theta$  range for the instrument.

From TEM analysis, P25 particles and pure anatase shows roughly isotropic shapes whereas pure rutile TiO<sub>2</sub> particle crystalize as c-axis oriented needles. Thus, TiO<sub>2</sub> particle sizes were calculated using Scherrer equation from rutile (110), (101), (200) peaks and anatase (101), (103), (004) and (112) peaks for both P25 and pure anatase support. With the (001) rutile diffraction peak being forbidden, no easy estimation of the rutile needle length could be made. However, rutile needle width could be estimated from the (110) and (200) diffraction peaks; (101) and (111) diffraction peaks were excluded for this calculation because of their combined a- and c-axes influence.

**S-19.** Procedure of evaluating TiO<sub>2</sub> crystal size using Scherrer equation.

The redistribution process of RuO<sub>2</sub> during heat treatment from anatase TiO<sub>2</sub> particles to rutile TiO<sub>2</sub> particles appears to play a major role into the catalyst activation. As previously observed by Xiang et al.<sup>2</sup>, this phenomenon only occur for small RuO<sub>2</sub> particles (2 nm or smaller). In this size range, it is well known that surface tension dominates most physicochemical properties of nanomaterials, especially the interface behaviour and surface stability. When thermal energy (heat) is applied to the system, the small RuO<sub>2</sub> particles can overcome the constraints from the bulk network in order to minimize global free energy, either by diffusion to grow into bigger particles or undergoing shape change. The shape transformation (from sphere to thin layer) is driven by the surface relaxation due to epitaxy stabilization at the interface of rutile TiO<sub>2</sub> and RuO<sub>2</sub>. The mechanism of departure of the ruthenium atoms from anatase TiO<sub>2</sub> surface remains less clear. Two possible pathways can be proposed: RuO<sub>2</sub> local volatilization followed by redeposition and RuO<sub>2</sub> nanoparticle diffusion.

Indeed, RuO<sub>2</sub> vaporization/condensation phenomena have been addressed in the fabrication of  $\alpha$ -Al<sub>2</sub>O<sub>3</sub> at 1000 °C with RuO<sub>2</sub> crystals trapped in the matrix, presenting a Ru gradient from the core of the sample to the surface.<sup>3</sup> Upon heating in oxidative atmosphere, the two following equilibrium can be considered:

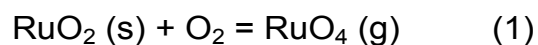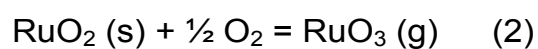

In this way, during heat activation, RuO<sub>2</sub>(s) on TiO<sub>2</sub> support could be locally vaporized as RuO<sub>x</sub> gas and randomly redeposited as RuO<sub>2</sub> on other TiO<sub>2</sub> surface. When deposited on rutile TiO<sub>2</sub>, stabilization and fixation would occur through epitaxy. Vaporization would occur again for RuO<sub>2</sub> on anatase support, until RuO<sub>2</sub> could be redeposited on rutile TiO<sub>2</sub>.

However, the amount of RuO<sub>x</sub> gas in equilibrium with RuO<sub>2</sub> usually remains very low: For example, under pure oxygen static atmosphere (1 atm), vapour pressure has been measured at 0,2. 10<sup>-3</sup> atm at 1000 °C.<sup>4,5</sup> Thermodynamic calculations, based on experiments, have allowed to establish the total RuO<sub>x</sub> vapour pressure depending on the atmosphere and temperature: <sup>6</sup>

$$P(\text{RuO}_4)=\exp(20.002 - 2.2867*\ln T - 15562.5/T + \ln P(\text{O}_2))$$

$$P(\text{RuO}_3)=\exp(37.939 - 3.0590*\ln T - 32488.1/T + 0.5*\ln P(\text{O}_2))$$

Given these equations, the RuO<sub>x</sub> vapour pressure reaches 1.2. 10<sup>-8</sup> atm only at 450°C in air. According to Le Chatelier's principle, both equilibrium can be displaced: towards volatilization under high oxygen gas flow, or towards RuO<sub>2</sub> deposition from RuO<sub>3</sub>/RuO<sub>4</sub> rich atmosphere.<sup>7</sup> This explain why the rare studies published concerning pure bulk (unsupported and unstabilised) RuO<sub>2</sub> catalyst in automotive for NO<sub>x</sub> reduction report that, under extremely high gas flow (100000 h<sup>-1</sup> space velocity), a drastic loss of ruthenium occurs over time.<sup>8</sup> Of course, our static conditions of heat treatment at 450 °C in static air do not favour this volatilization of RuO<sub>4</sub> and RuO<sub>3</sub>. Here, the Ru initial loading is preserved during our

entire process (from RuO<sub>2</sub> deposition until the end of the catalytic test). Thus, if volatilization cannot be thermodynamically totally excluded, it has to remain unfavoured, local (volatilization followed by immediate redeposition) and partial under our experimental conditions.

Small RuO<sub>2</sub> nanoparticles, on the other hand, have already been proven to be able to diffuse at the surface of particles. Indeed, at temperature as low as 300 °C, small RuO<sub>2</sub> nanoparticles embedded into amorphous silica matrix can diffuse and grow at the surface of the RuO<sub>2</sub>/SiO<sub>2</sub> composite layer in the generated porosity path, whereas larger RuO<sub>2</sub> particles (above 4nm) lose their ability to diffuse and remain trapped.<sup>9</sup>

The driving force of this diffusive sintering phenomenon can be understood in terms of two operative mechanisms: Ostwald ripening (OR) or particle migration and coalescence (PMC). OR involves interparticle transport of mobile molecular species (clusters), driven by differences in free energy and local adatom concentrations on the support surface. In contrast, PMC involves the mobility of particles in a Brownian-like motion on the support surface, with subsequent coalescence when particles come in close proximity to each other. In the early stage of diffusive sintering, evidence from recent in situ studies suggest that OR dominates the diffusion of nanoparticles towards sintering when particles are very small.<sup>10–13</sup>

In this current study, the diffusion driven by OR explains the migration of RuO<sub>2</sub> nanoparticles at the surface of TiO<sub>2</sub> particle. Subsequently, the diffusion of RuO<sub>2</sub> nanoparticles leads to two different phenomena in terms of sintering: isotropic

growth of RuO<sub>2</sub> crystals on pure anatase TiO<sub>2</sub> and epitaxial growth of RuO<sub>2</sub> layers on rutile TiO<sub>2</sub> (P25 and pure TiO<sub>2</sub> rutile support)

**SI-20.** RuO<sub>2</sub> nanoparticles migration discussion



## References

- 1 R. D. Shannon, *Acta Crystallogr., Sect. A*, 1976, **A32**, 751–767.
- 2 G. Xiang, X. Shi, Y. Wu, J. Zhuang and X. Wang, *Sci. Rep.*, 2012, **2**, 801.
- 3 L. Ji, J. Lin and H. C. Zeng, *Chem. Mater.*, 2001, **13**, 2403–2412.
- 4 W. E. Bell and M. Tagami, *J. Phys. Chem.*, 1963, **67**, 2432–2436.
- 5 H. Schaefer, A. Tebben, W. Gerhardt, V. Harald and A. Tebben, *Z. Anorg. Allg. Chem.*, 1963, **321**, 41–55.
- 6 F. Garisto, *AECL-9552, Whiteshell Nucl. Res. Establ.*, 1988.
- 7 M. T. Colomer and M. J. Velasco, *J. Eur. Ceram. Soc.*, 2007, **27**, 2369–2376.
- 8 H. S. Gandhi, H. K. Stepien and M. Shelef, *Mater. Res. Bull.*, 1975, **10**, 837–845.
- 9 X. Paquez, G. Amiard, G. de Combarieu, C. Boissiere and D. Grosso, *Chem. Mater.*, 2015, **27**, 2711–2717.
- 10 T. W. Hansen, A. T. De La Riva, S. R. Challa, A. K. Datye, A. T. Delariva, S. R. Challa and A. K. Datye, *Acc. Chem. Res.*, 2013, **46**, 1720–1730.
- 11 S. B. Simonsen, I. Chorkendorff, S. Dahl, M. Skoglundh, J. Sehested and S. Helveg, *J. Am. Chem. Soc.*, 2010, **132**, 7968–7975.
- 12 K. Yoshida, A. Bright and N. Tanaka, *J. Electron Microsc.*, 2012, **61**, 99–103.
- 13 A. D. Benavidez, L. Kovarik, A. Genc, N. Agrawal, E. M. Larsson, T. W. Hansen, A. M. Karim and A. K. Datye, *ACS Catal.*, 2012, **2**, 2349–2356.
